# Supplementary material for: Enhancing Mechanical Properties of Graft-Type Nanocomposites Using Organically Modified SiO2 and Polypropylene Containing Reactive Methoxy Groups
Source: MDPI journal article supplement (doi:10.3390/polym14030563), 2022-01-30
Supplement: s1 [file s1]

# Supplementary Information

Table of contents

Figure S1.  $^1\text{H}$  NMR spectra of HomoPP and PP-OTMS.

Figure S2. TEM images of neat and surface modified  $\text{SiO}_2$  nanoparticles.

Figure S3.  $^1\text{H}$  NMR of PP-OTMS and its nanocomposites before and after melt mixing.

Figure S4. DSC profiles during heating.

Figure S5. DSC profiles during cooling.

Figure S6. Stress-strain curves.

Figure S7. Tensile properties: (a) Young's modulus, (b) yield strength, (c) elongation at break, and (d) toughness of nanocomposites.

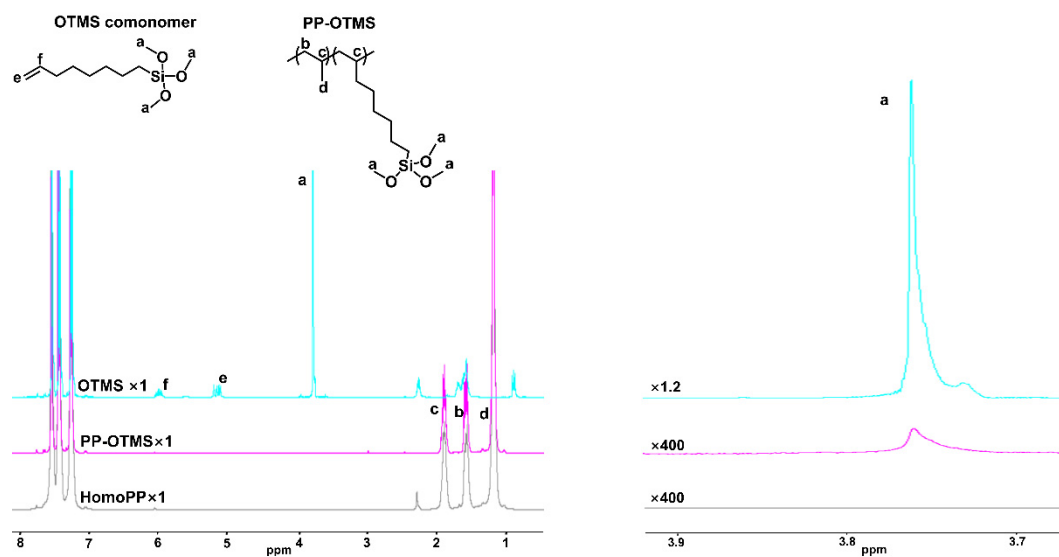

**Figure S1.**  $^1\text{H}$  NMR spectra of HomoPP and PP-OTMS. The right figure enlarges the methoxy region.

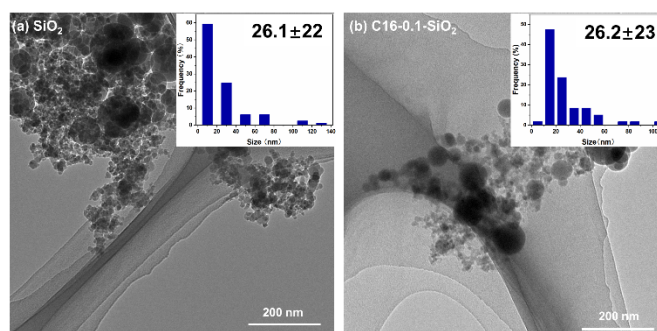

**Figure S2.** TEM images of neat and surface modified  $\text{SiO}_2$  nanoparticles.



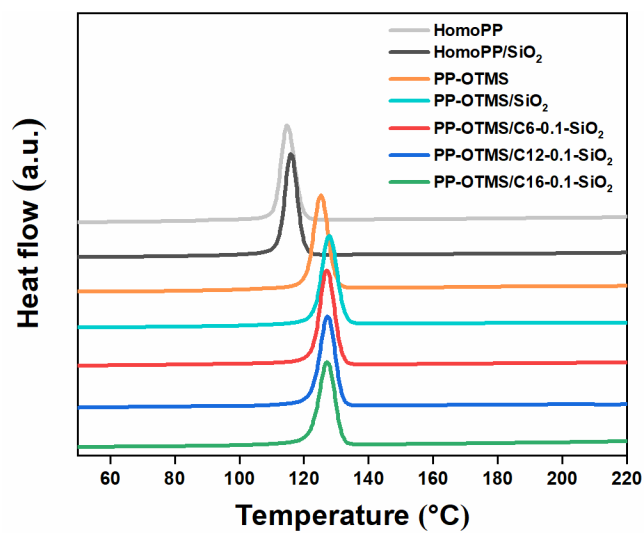

Figure S5. DSC profiles during cooling. Profiles are vertically shifted for visual clarity.

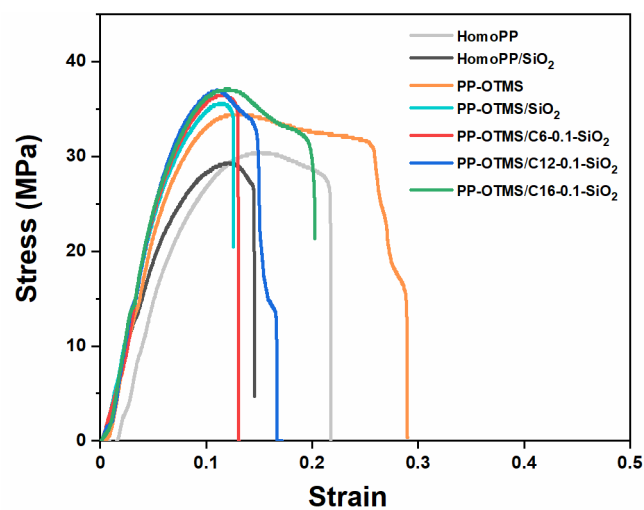

Figure S6. Stress-strain curves.

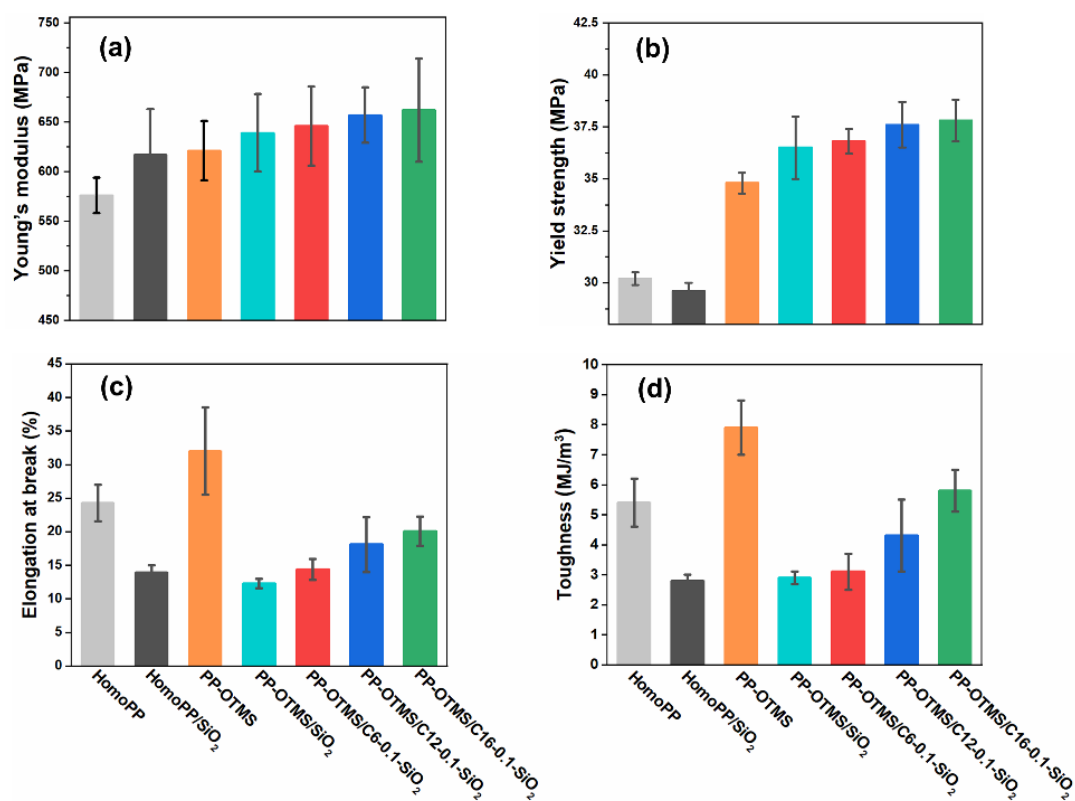

**Figure S7.** Tensile properties: (a) Young's modulus, (b) yield strength, (c) elongation at break, and (d) toughness of nanocomposites.
